# Supplementary material for: Macrophage reprogramming combined with enhanced photodynamic therapy increases the patency of malignant esophageal obstruction after stenting
Source: Royal Society of Chemistry journal article supplement (doi:10.1039/d4nr01140f), 2024-01-01
Supplement: d4nr01140f1.pdf [file d4nr01140f1.pdf]

Supplementary Information for:

# Macrophages Reprogramming Combined with Enhanced Photodynamic Therapy Increase Patency of Malignant Esophageal Obstruction after Stenting

*Haoyang Xu, ‡<sup>a</sup> Yiran Zhang, ‡<sup>a</sup> Sheng Guo,<sup>a</sup> Hui Fang,<sup>a</sup> Liming Wei,<sup>a</sup> Guangchen He,<sup>a</sup>  
Yingsheng Cheng<sup>\*b</sup> and Yueqi Zhu <sup>\*a</sup>*

<sup>a</sup> The Department of Radiology; Shanghai Sixth People's Hospital Affiliated to Shanghai Jiao  
Tong University School of Medicine; No. 600, Yishan Road; Shanghai, 200233, P. R. China.

<sup>b</sup> The Department of Imaging Medicine and Nuclear Medicine; Tongji Hospital of Tongji  
University; No. 389, Xincun Road; Shanghai, 200065, P. R. China

**\* Corresponding author.** Contact: E-mail: zhuyueqi@sjtu.edu.cn; Tel.: +86-21-66301136; Fax:  
+86-21-66303983

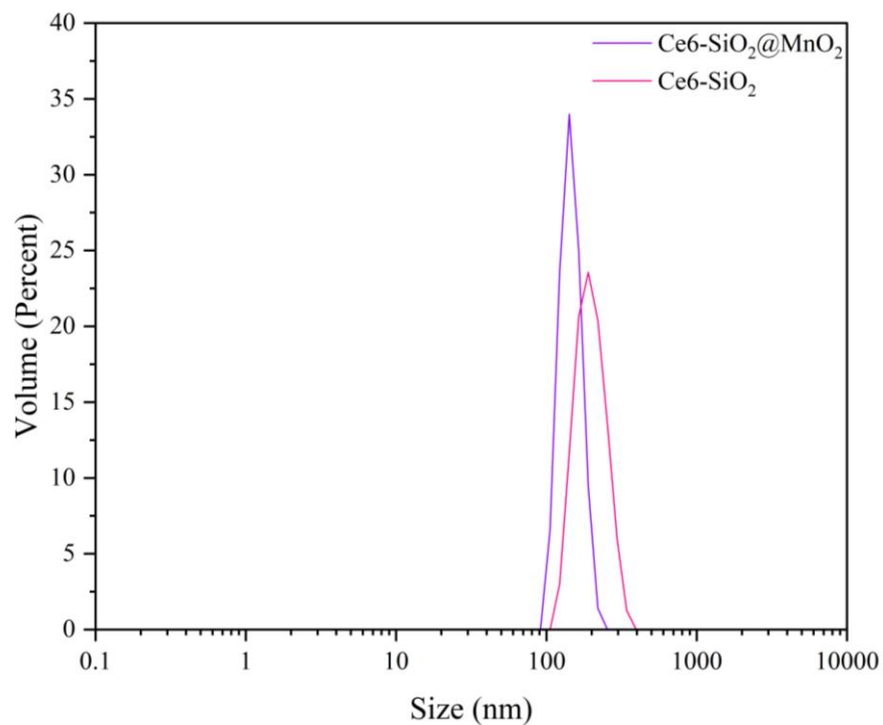

**Figure S1.** Particle size distribution of Ce6-SiO<sub>2</sub>@MnO<sub>2</sub> and SiO<sub>2</sub>-Ce6.

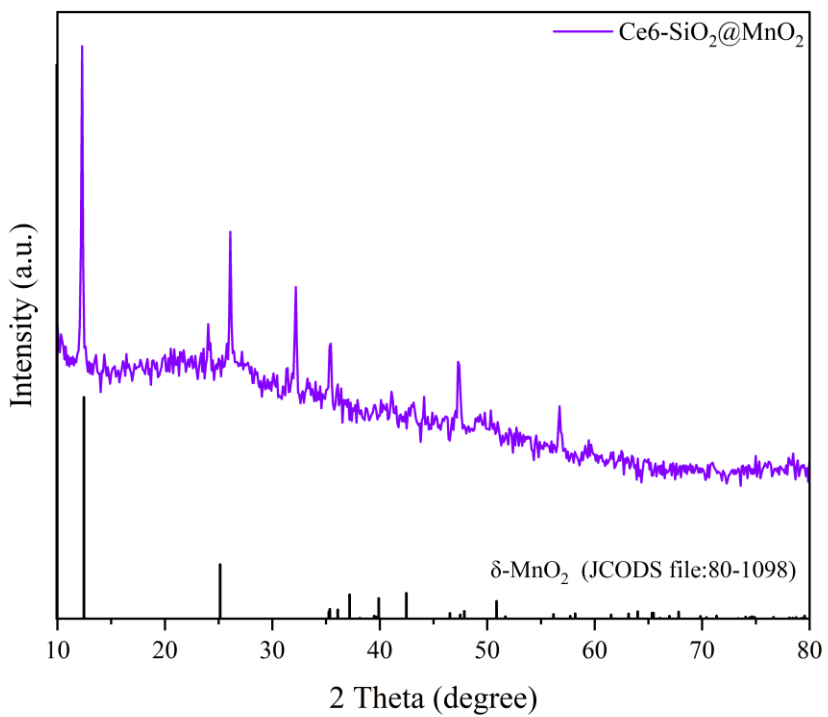

**Figure S2.** X-ray diffractometer patterns of Ce6-SiO<sub>2</sub>@MnO<sub>2</sub> and  $\delta$ -MnO<sub>2</sub>.

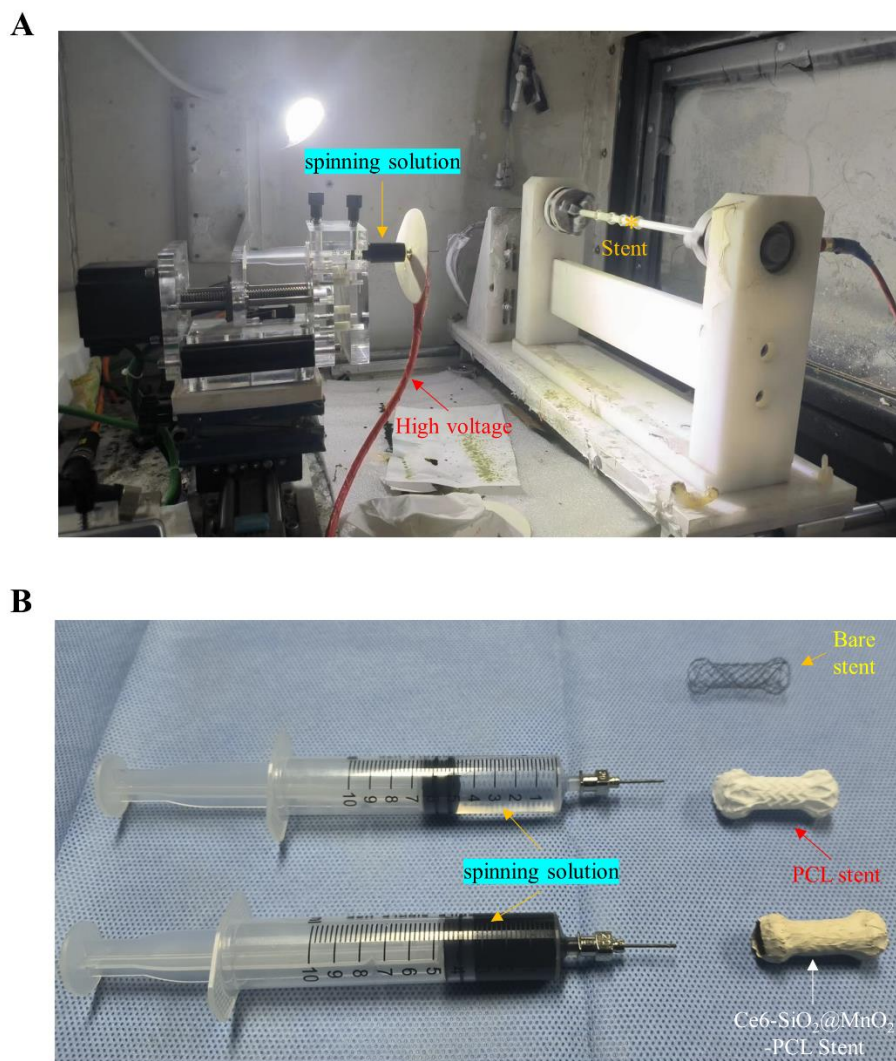

**Figure S3.** The process of electrospinning. A) Representative photo of the electrospinning process. B) Photo of the spinning solution with corresponding coated stent.

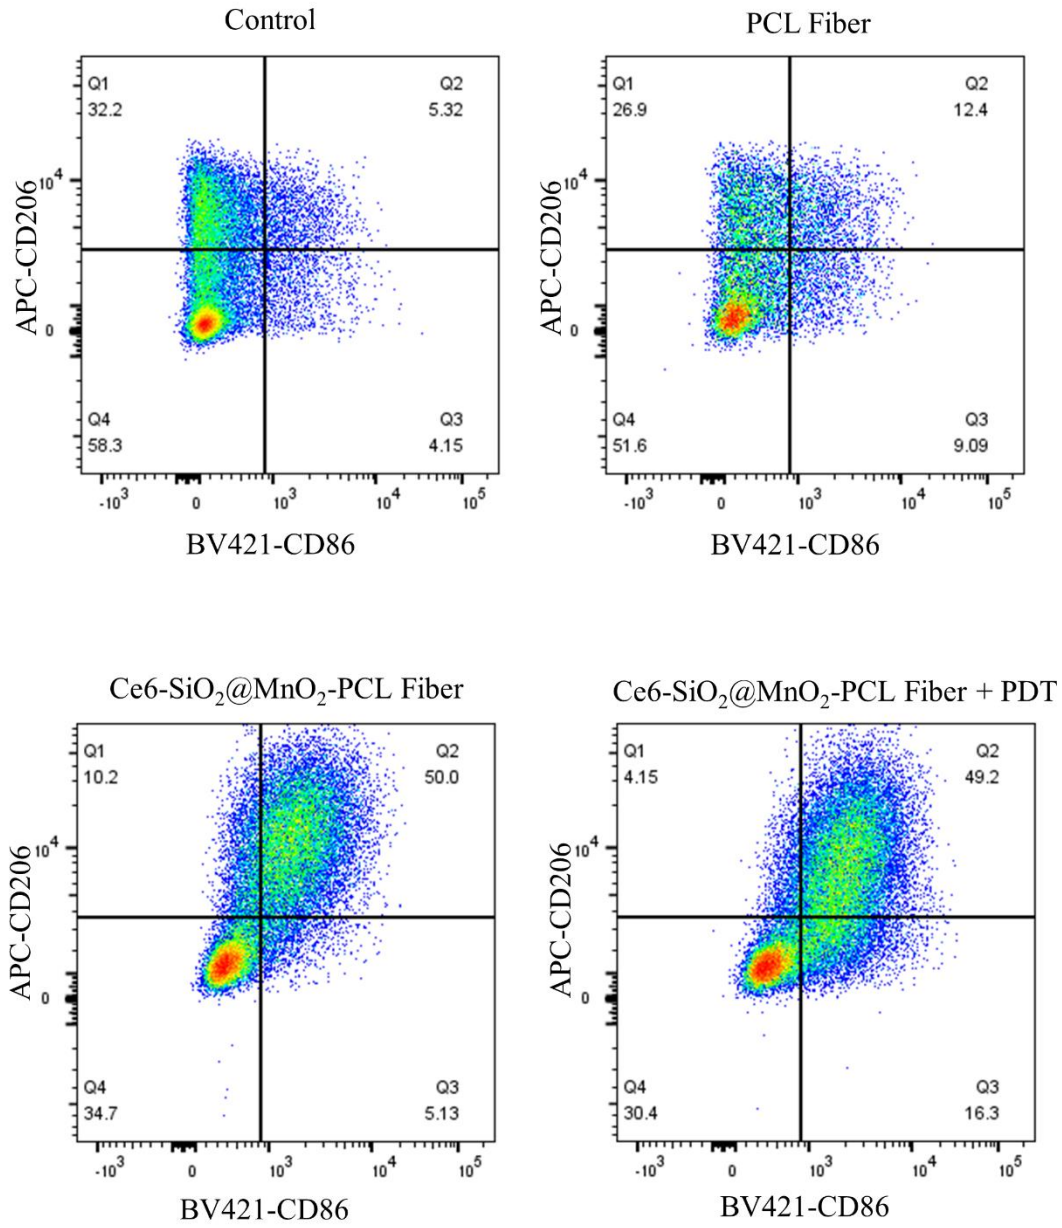

**Figure S4.** Flow cytometric analysis of tumor associated macrophages (TAMs) in mice under different treatment. CD86 and CD206 are characteristic surface molecules of M1 and M2 type macrophages, respectively.

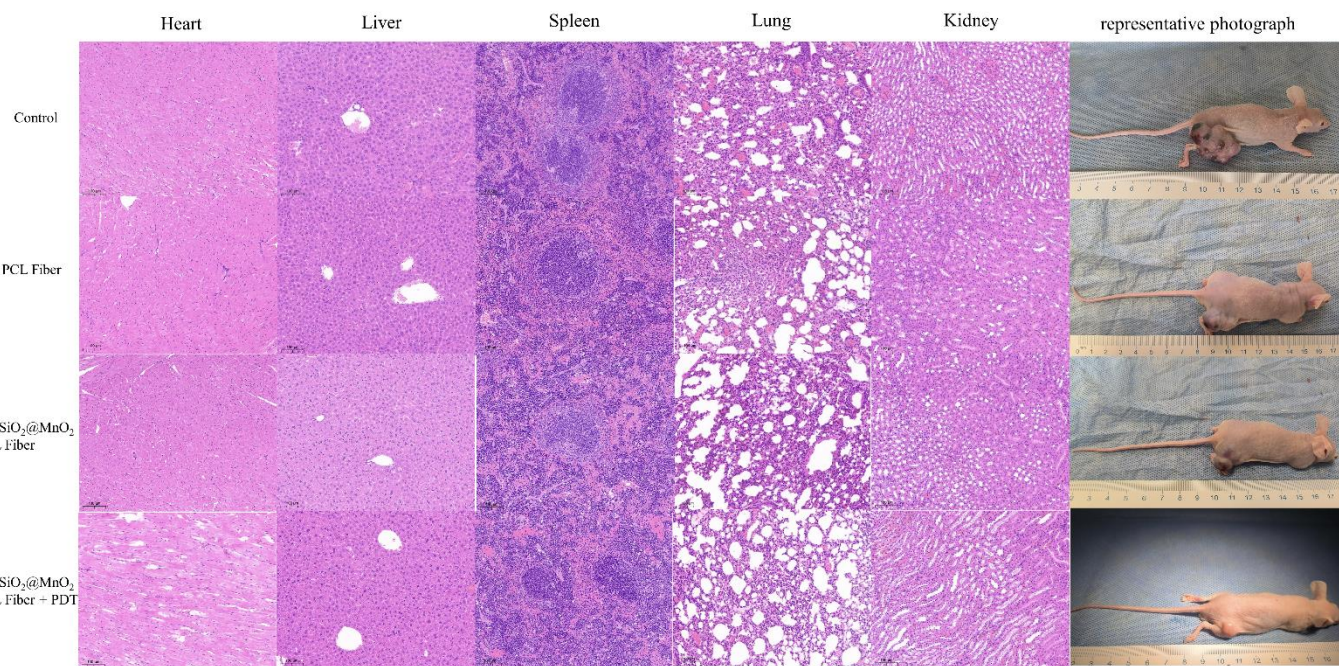

**Figure S5.** Hematoxylin-eosin (H&E) staining of heart, liver, spleen, lung, kidney and representative photos of AKR mouse subcutaneous tumor models under different treatment.

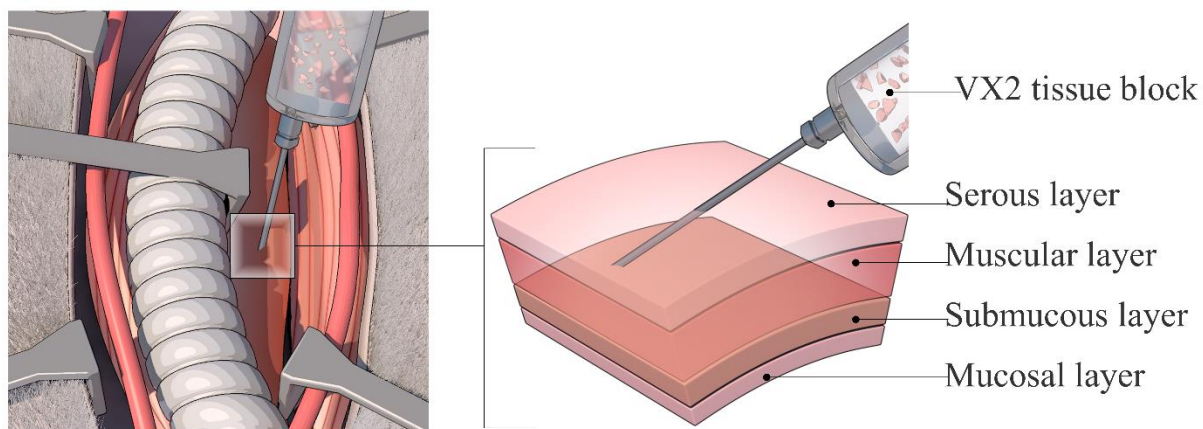

VX2 tissue block was injected into esophageal submucosa layer.

**Figure S6.** Schematic representation of modeling procedure of malignant esophageal obstruction model in VX2 rabbits.

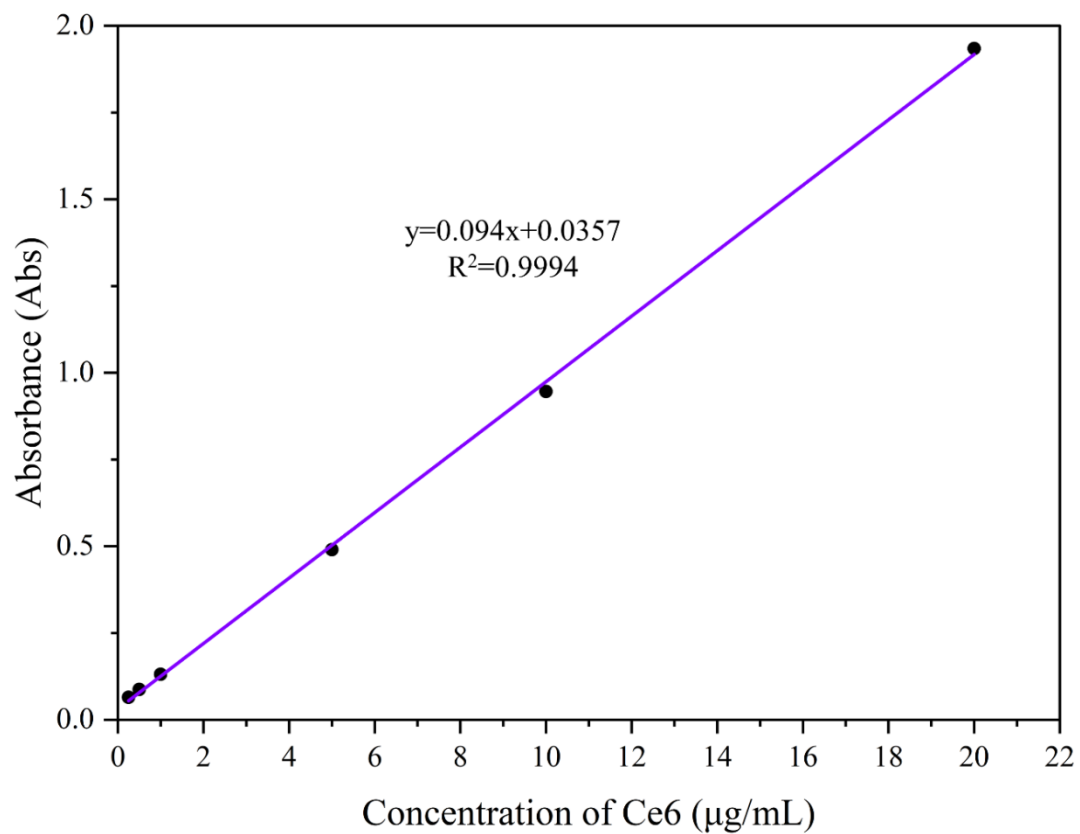

**Figure S7.** Concentration-absorbance standard curve of Ce6.

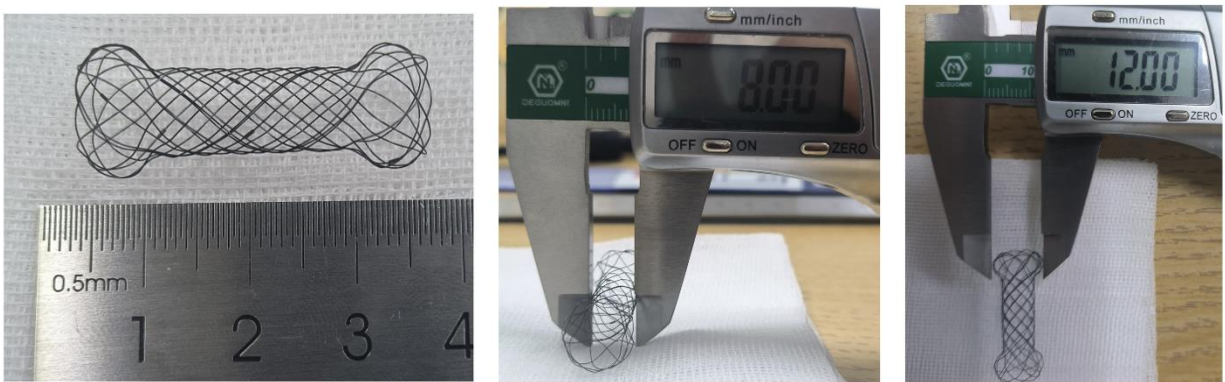

**Figure S8.** Detailed parameters of the bare esophageal stent.

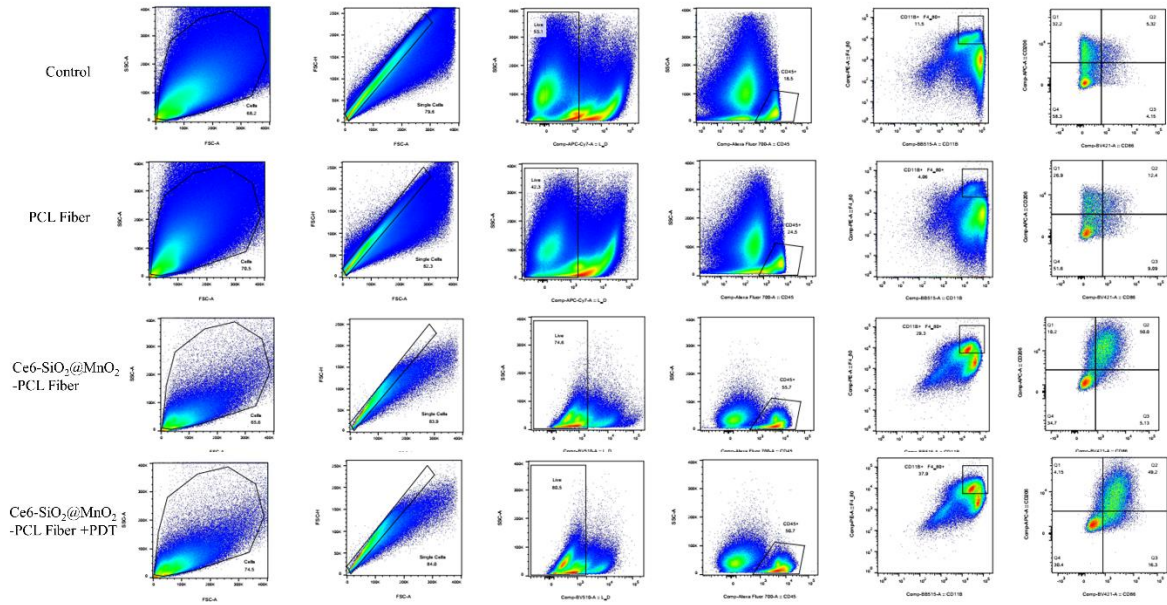

**Figure S9.** The Loop-gate logic for flow cytometry to detect macrophage polarization. FVS780-CD45+CD11b+F4/80+ cells were defined as living macrophages, among which CD86+ and CD206+ cells were defined as M1 and M2 macrophages, respectively.

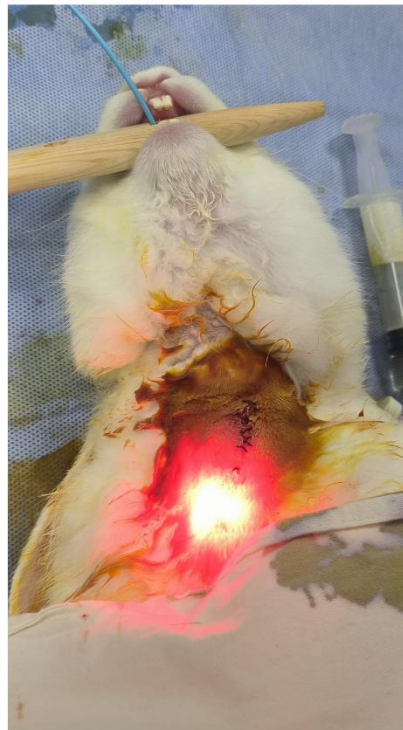

**Figure S10.** Representative photos of VX2 rabbit malignant esophageal obstruction model treated with intraesophageal photodynamic therapy (PDT).

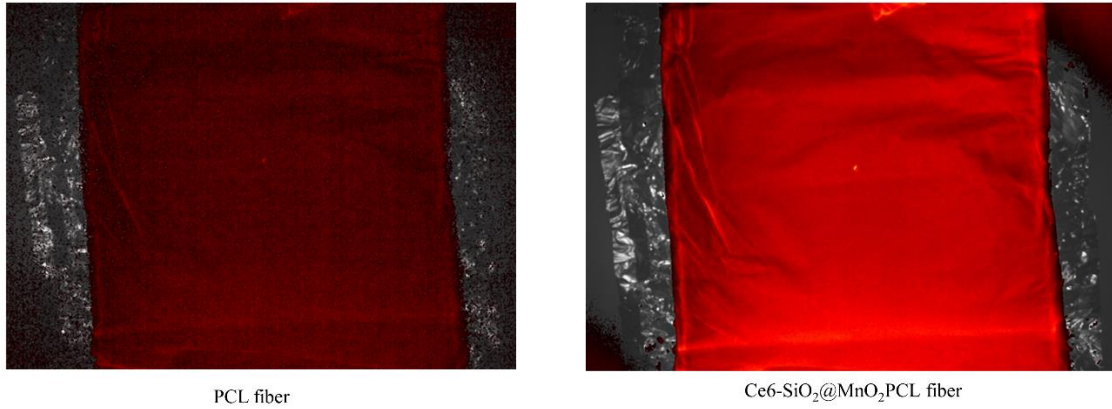

**Figure S11.** Interactive video information system (IVIS) images of PCL fiber and Ce6-SiO<sub>2</sub>@MnO<sub>2</sub>-PCL fiber.

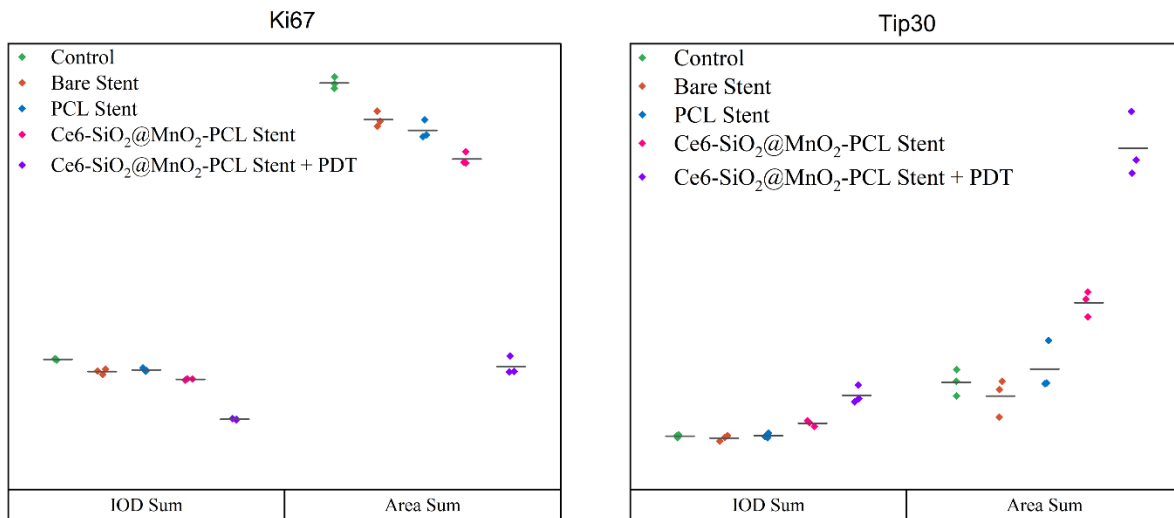

**Figure S12.** Quantitative analysis of the integrated optical density (IOD) value and the area of the positive region of Ki67/TIP30 in malignant esophageal obstruction model.



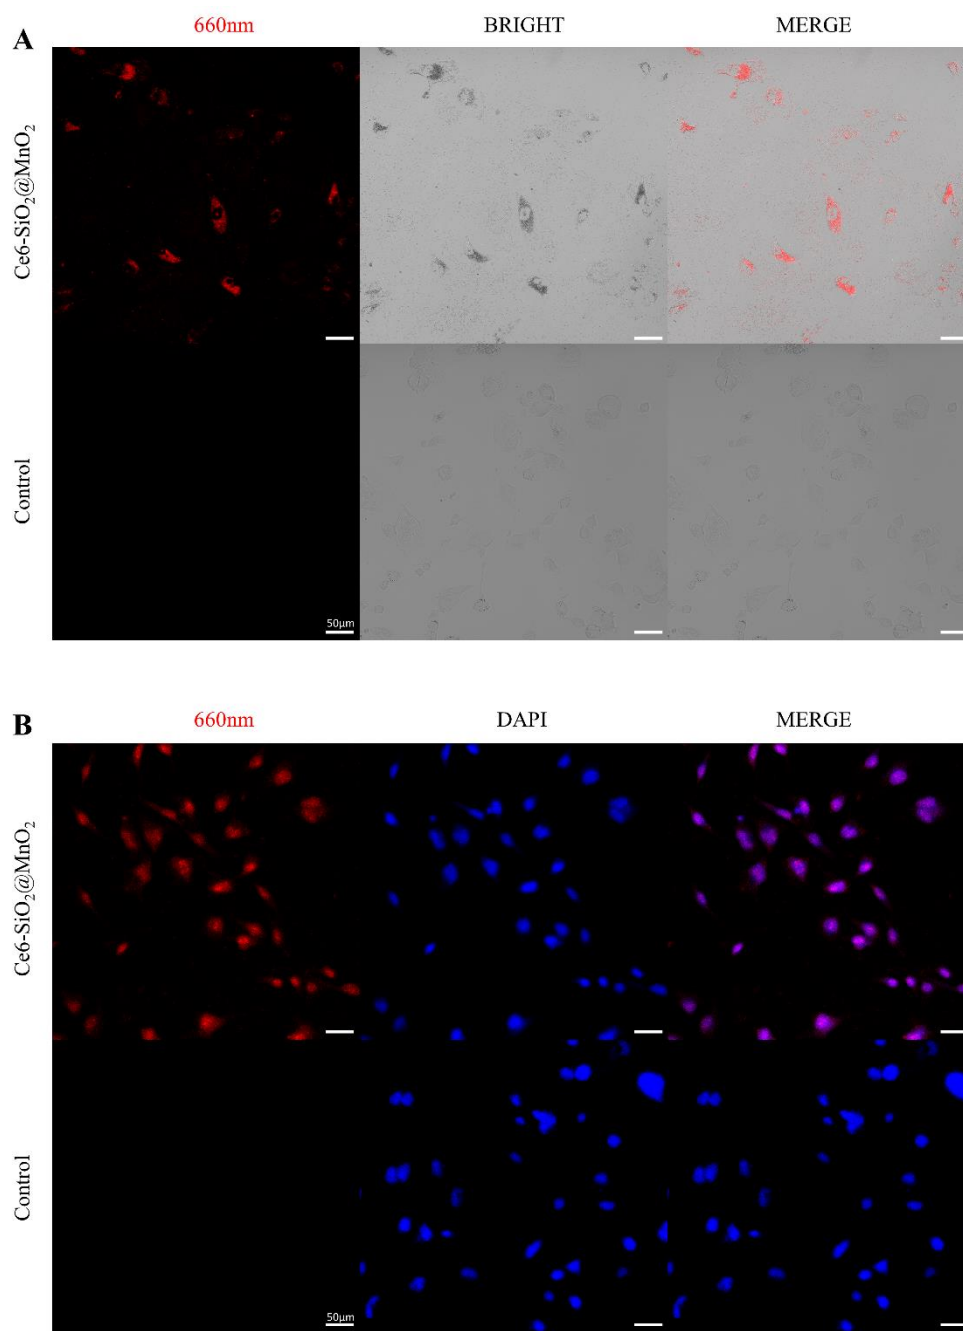

**Figure S13.** Confocal images of AKR cells incubated with Ce6-SiO<sub>2</sub>@MnO<sub>2</sub>, PBS for 24 h. A) 660nm channel and bright were applied to observe the distribution of Ce6-SiO<sub>2</sub>@MnO<sub>2</sub>. B) 660nm channel and DAPI were applied to observe the distribution of Ce6-SiO<sub>2</sub>@MnO<sub>2</sub>. Red and blue represent Ce6 and DAPI fluorescence, respectively.

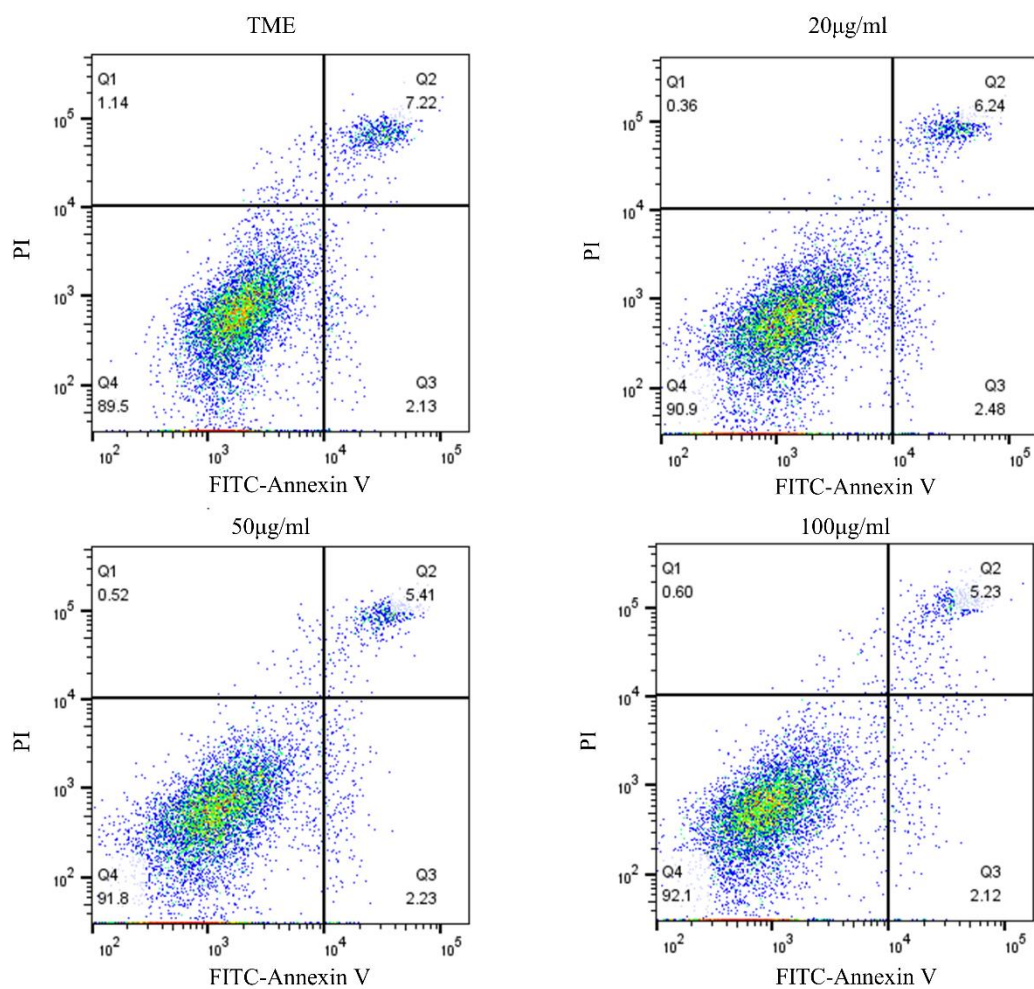

**Figure S14.** Flow cytometry diagram of apoptosis of AKR cells treated with different concentrations of Ce6-SiO<sub>2</sub>@MnO<sub>2</sub> (0, 20, 50, and 100 µg/mL) in TME.

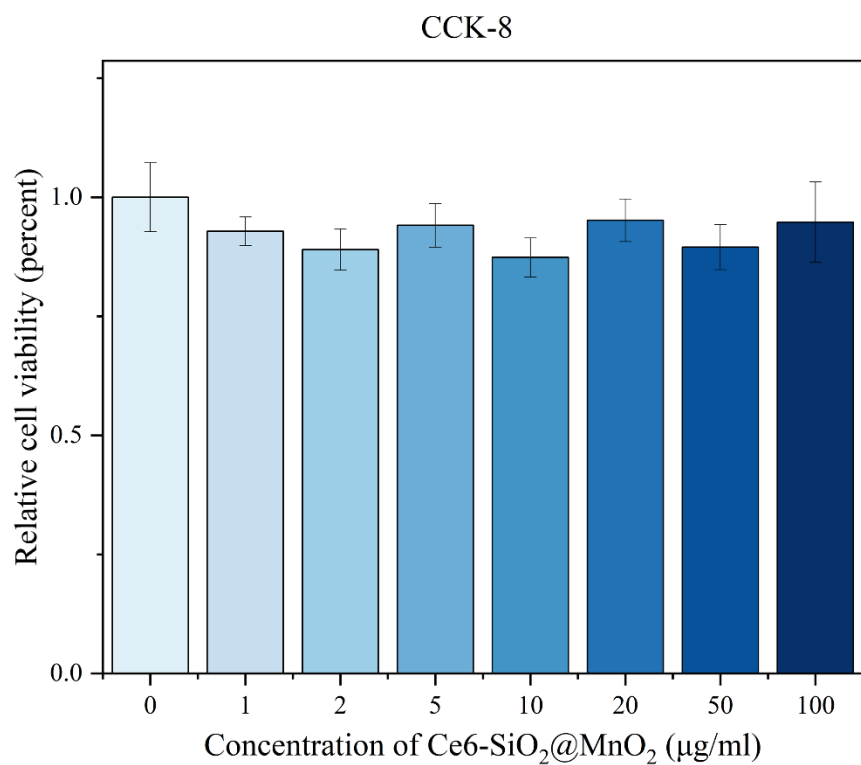

**Figure S15.** The relative activity of 3T3 cells were detected by CCK-8 experiments with different concentrations of Ce6-SiO<sub>2</sub>@MnO<sub>2</sub>.

**Table S1.** Comparison table of PCR primers and sequences.

| <b>Primer</b>         | <b>Sequence</b>            |
|-----------------------|----------------------------|
| HMGB1 FORWARD         | AGGCTGACAAGGCTCGTTATGAAAG  |
| HMGB1 REVERSE         | GGGCGGTACTCAGAACAGAACAAG   |
| STAT1 FORWARD         | GCTGCCGAGAACATAACCAGAGAATC |
| STAT1 REVERSE         | CCAGTTCGCTTAGGGTCGTCAAG    |
| IL-10 FORWARD         | TGGGTTGCCAAGCCTTATCG       |
| IL-10 REVERSE         | CTCTTCACCTGCTCCACTGC       |
| TNF- $\alpha$ FORWARD | CGCTCTTCTGTCTACTGAACTTCGG  |
| TNF- $\alpha$ REVERSE | GTGGTTTGTGAGTGTGAGGGTCTG   |
| GAPDH FORWARD         | GGCAAATTCAACGGCACAGTCAAG   |
| GAPDH REVERSE         | TCGCTCCTGGAAGATGGTGATGG    |

**Table S2.** Table of subcutaneous tumor volume over time in AKR mouse.

| <b>Tumor volume<br/>(mm<sup>3</sup>)</b>                   | <b>0day</b> | <b>2day</b> | <b>4day</b> | <b>6day</b> | <b>8day</b> | <b>10day</b> | <b>12day</b> | <b>14day</b> |
|------------------------------------------------------------|-------------|-------------|-------------|-------------|-------------|--------------|--------------|--------------|
| <b>Control</b>                                             | 126.20      | 201.82      | 337.92      | 556.88      | 753.40      | 1130.99      | 1297.40      | 1497.10      |
|                                                            | 114.15      | 165.77      | 285.90      | 537.67      | 638.00      | 864.78       | 949.33       | 1048.42      |
|                                                            | 101.48      | 146.82      | 248.10      | 366.53      | 506.82      | 652.99       | 708.60       | 882.47       |
| <b>PCL</b>                                                 | 115.38      | 172.06      | 291.84      | 353.01      | 473.34      | 683.52       | 955.85       | 1140.63      |
|                                                            | 120.47      | 156.56      | 248.35      | 331.45      | 457.33      | 600.14       | 837.15       | 1032.79      |
|                                                            | 102.79      | 164.93      | 288.86      | 383.11      | 435.90      | 549.61       | 651.75       | 790.79       |
| <b>Ce6-SiO<sub>2</sub>@MnO<sub>2</sub> -<br/>PCL</b>       | 121.77      | 163.93      | 358.71      | 360.63      | 494.55      | 568.51       | 664.30       | 879.33       |
|                                                            | 108.71      | 111.88      | 155.32      | 155.44      | 315.80      | 339.11       | 413.07       | 702.27       |
|                                                            | 116.58      | 146.56      | 193.98      | 258.87      | 354.61      | 444.45       | 614.34       | 779.54       |
| <b>Ce6-SiO<sub>2</sub>@MnO<sub>2</sub> -<br/>PCL + PDT</b> | 109.44      | 121.73      | 99.49       | 126.51      | 155.33      | 203.75       | 206.35       | 192.02       |
|                                                            | 103.45      | 106.65      | 128.46      | 125.41      | 127.82      | 139.29       | 159.90       | 196.30       |
|                                                            | 120.73      | 134.25      | 174.35      | 155.89      | 208.84      | 242.71       | 260.90       | 329.40       |

**Table S3.** Magnetic resonance imaging (MRI) sequence parameters

| <b>Parameter</b>                      | <b>T2_tse_dixon_tra</b> | <b>T1_tse_tra</b> | <b>T1_vibe_dixon_tra</b> |
|---------------------------------------|-------------------------|-------------------|--------------------------|
| <b>Field of view (mm<sup>2</sup>)</b> | 250 × 250               | 250 × 250         | 280 × 238.6              |
| <b>Scan matrix</b>                    | 208 × 320               | 224 × 320         | 225 × 352                |
| <b>Voxel size (mm<sup>3</sup>)</b>    | 0.8 × 0.8 × 4.5         | 0.8 × 0.8 × 4.5   | 0.8 × 0.8 × 3.0          |
| <b>Echo time (ms)</b>                 | 70                      | 9                 | 2.46                     |
| <b>Repetition time (ms)</b>           | 3800                    | 519               | 5.65                     |
| <b>Slice thickness (mm)</b>           | 4.5                     | 4.5               | 3.0                      |
| <b>Number of Slice</b>                | 30                      | 30                | 60                       |
| <b>Flip angle</b>                     | 150                     | 120               | 10                       |
| <b>Acquisition time (min)</b>         | 1:37                    | 0:49              | 0:43                     |

**Table S4.** Energy dispersive X-ray spectroscopy (EDX) elements detection

| <b>Parameter</b>                           | <b>Si</b>             | <b>Mn</b>             | <b>K</b>              |
|--------------------------------------------|-----------------------|-----------------------|-----------------------|
| <b>Percentage (%)</b>                      | 76.383                | 15.950                | 1.833                 |
| <b>3-sigma</b>                             | 2.151                 | 0.373                 | 0.031                 |
| <b>Intensity (cps / <math>\mu</math>A)</b> | 0.1062                | 0.3833                | 0.1457                |
| <b>Data processing</b>                     | Quantitative analysis | Quantitative analysis | Quantitative analysis |
| <b>Test line</b>                           | Si Ka                 | Mn Ka                 | K Ka                  |
